# Supplementary material
Source: publisher figshare collection journal article supplement (https://karger.figshare.com/ndownloader/files/25353521)
Supplement: Supplementary file 1 [file 25353521]

**Supplementary Table S1. Genotype and allelic frequencies of *ADIPOQ* and *PPARG* in MH and MUH groups**

|  | **Normal**  **weight**  **MH**  **N=92** | **Normal**  **weight**  **MUH**  **N=40** | **p-value*** | **Excess weight**  **MH**  **N=74** | **Excess**  **weight**  **MUH**  **N=139** | **p-value*** |
| --- | --- | --- | --- | --- | --- | --- |
| **-11391G/A (rs17300539)** | | | | | | |
| GG | 0.91 | 0.85 | 0.357 | 0.89 | 0.86 | 0.667 |
| GA+AA | 0.09 | 0.15 | 0.11 | 0.14 |
| G | 0.95 | 0.93 | 0.398 | 0.95 | 0.93 | 0.678 |
| A | 0.05 | 0.07 | 0.05 | 0.07 |
| p-HWE | 0.804 | 0.608 |  | 0.623 | 0.387 |  |
| **-11377C/G (rs266729)** | | | | | | |
| CC | 0.45 | 0.48 | 0.850 | 0.47 | 0.45 | 0.885 |
| CG+GG | 0.55 | 0.52 | 0.53 | 0.53 |
| C | 0.67 | 0.69 | 0.887 | 0.68 | 0.68 | 1.000 |
| G | 0.33 | 0.31 | 0.32 | 0.32 |
| p-HWE | 0.710 | 0.944 |  | 0.773 | 0.627 |  |
| **+45T/G (rs2241766)** | | | | | | |
| TT | 0.66 | 0.80 | 0.147 | 0.74 | 0.72 | 0.749 |
| TG+GG | 0.34 | 0.20 | 0.26 | 0.28 |
| T | 0.82 | 0.89 | 0.203 | 0.86 | 0.85 | 0.778 |
| G | 0.18 | 0.11 | 0.14 | 0.15 |
| p-HWE | 0.922 | 0.434 |  | 0.626 | 0.661 |  |
| **+276G/T (rs1501299)** | | | | | | |
| GG | 0.58 | 0.60 | 0.849 | 0.43 | 0.55 | 0.117 |
| GT+TT | 0.42 | 0.40 | 0.57 | 0.45 |
| G | 0.77 | 0.79 | 0.873 | 0.69 | 0.74 | 0.309 |
| T | 0.23 | 0.21 | 0.31 | 0.26 |
| p-HWE | 0.288 | 0.446 |  | 0.875 | 0.855 |  |
| **Pro12Ala (rs1801282)** | | | | | | |
| Pro12Pro | 0.73 | 0.83 | 0.275 | 0.84 | 0.76 | 0.222 |
| Pro12Ala +Ala12Ala | 0.27 | 0.17 | 0.16 | 0.24 |
| Pro12 | 0.86 | 0.91 | 0.311 | 0.91 | 0.88 | 0.331 |
| Ala12 | 0.14 | 0.09 | 0.09 | 0.12 |
| p-HWE | 0.131 | 0.544 |  | 0.533 | 0.393 |  |
| MH: Metabolically healthy; MUH: Metabolically unhealthy; HWE: Hardy-Weinberg Equilibrium  * Probability with the *X*2 test by genotypes and alleles for a 2x2 table. | | | | | | |
